# Supplementary material for: Persea americanaseed extract mediated gold nanoparticles for mercury(ii)/iron(iii) sensing, 4-nitrophenol reduction, and organic dye degradation
Source: Royal Society of Chemistry journal article supplement (doi:10.1039/c9ra08233f), 2019-01-01
Supplement: c9ra08233f1.pdf [file c9ra08233f1.pdf]

## *Persea Americana* Seed Extract Mediated Gold Nanoparticles for Mercury (II)/ Iron (III) sensing, 4-nitrophenol reduction, and organic dye degradation

Naveen Kumar Reddy Bogireddy\*<sup>a</sup> and Vivechana Agarwal\*<sup>a</sup>

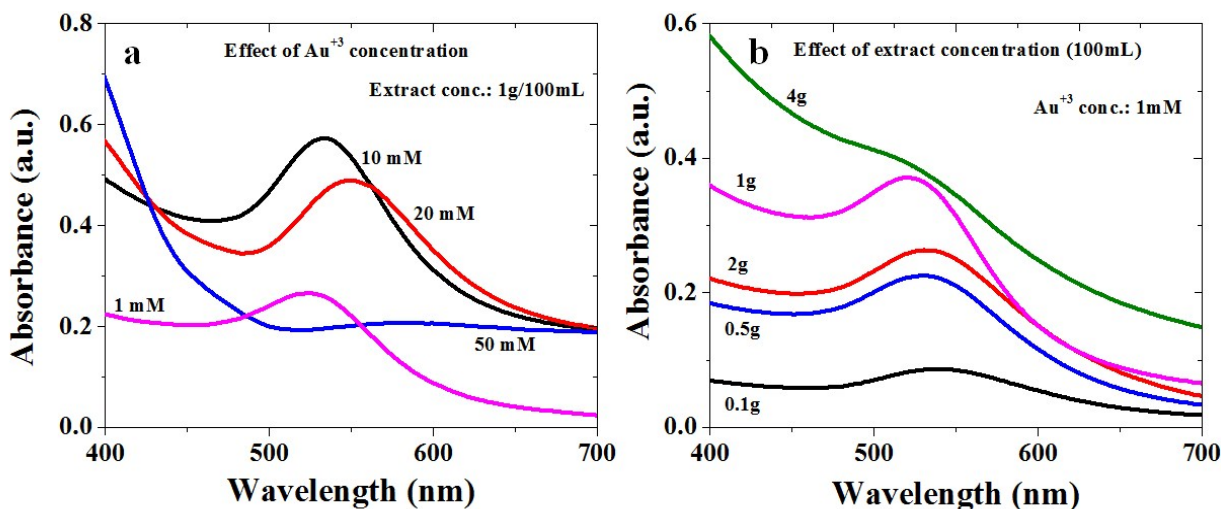

Fig. S1 UV-visible absorbance spectra of the colloidal Av-AuNPs by controlling the concentrations of (a) Au<sup>3+</sup> ion (i.e., as-prepared avocado seed extract is maintained constant 2mL) and (b) seed extract is varied from 0.1 to 4g/100 mL (i.e., Au<sup>3+</sup> ion concentration maintained as 1mM).

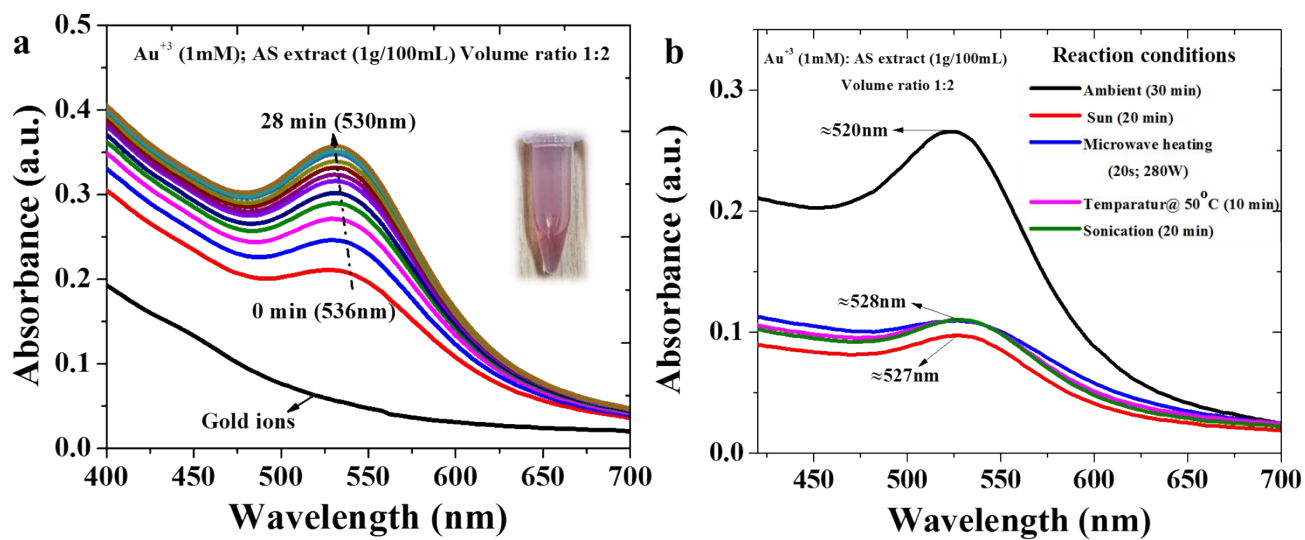

**Figure S2** (a) Real time monitoring of Av-AuNPs synthesis (1mM  $\text{Au}^{+3}$  salt reduced with 1g/100mL of AS extract with 1:2 volume ratio) in UV-vis absorbance spectroscopy and (b) effect of controlling the external conditions in the formation of Av-AuNPs.

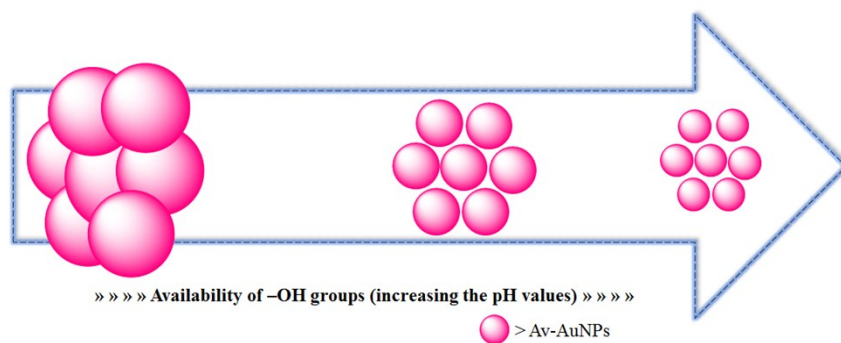

**Figure S3** The possible effect of avocado seed extract-controlled pH values on the size control of the AuNPs.

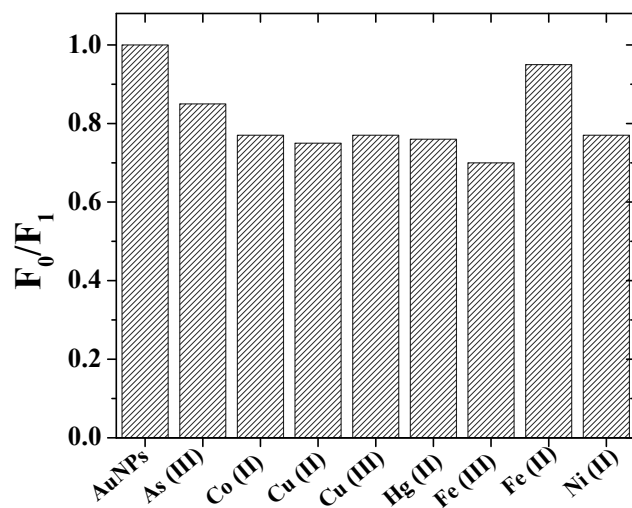

**Figure S4** Normalized absorbance intensities of different heavy metal ions (i.e., F1, F0 represent the absorbance intensity before and after the incorporation of the metal ions in Av-AuNPs).

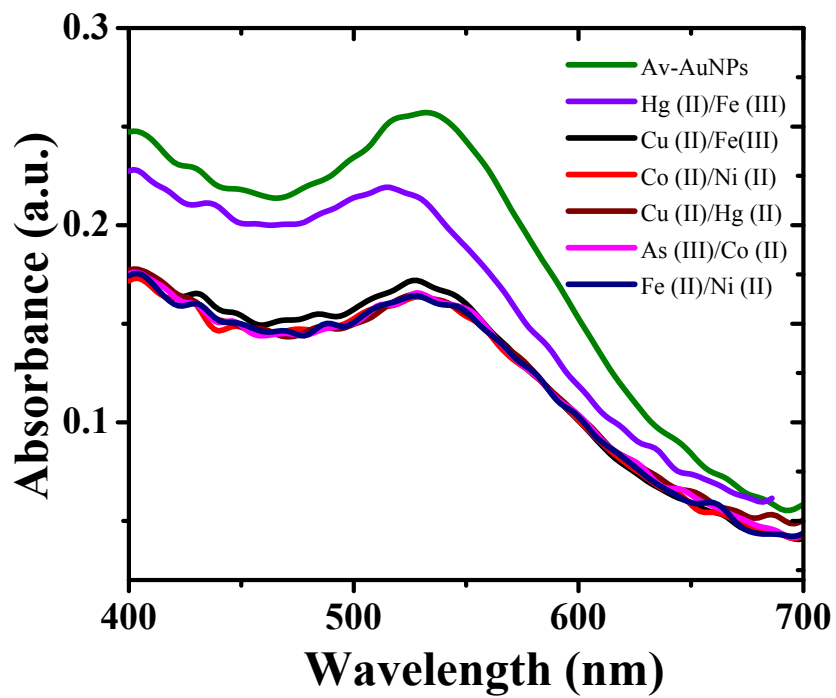

**Figure S5.** Absorbance spectra corresponding to the sensing of Hg(II)/Fe(III) as compared with other metal ion combinations using Av-AuNPs.
